# Supplementary material
Source: HighWire-hosted journal article supplement (https://bmjophth.bmj.com/content/6/1/e000695)

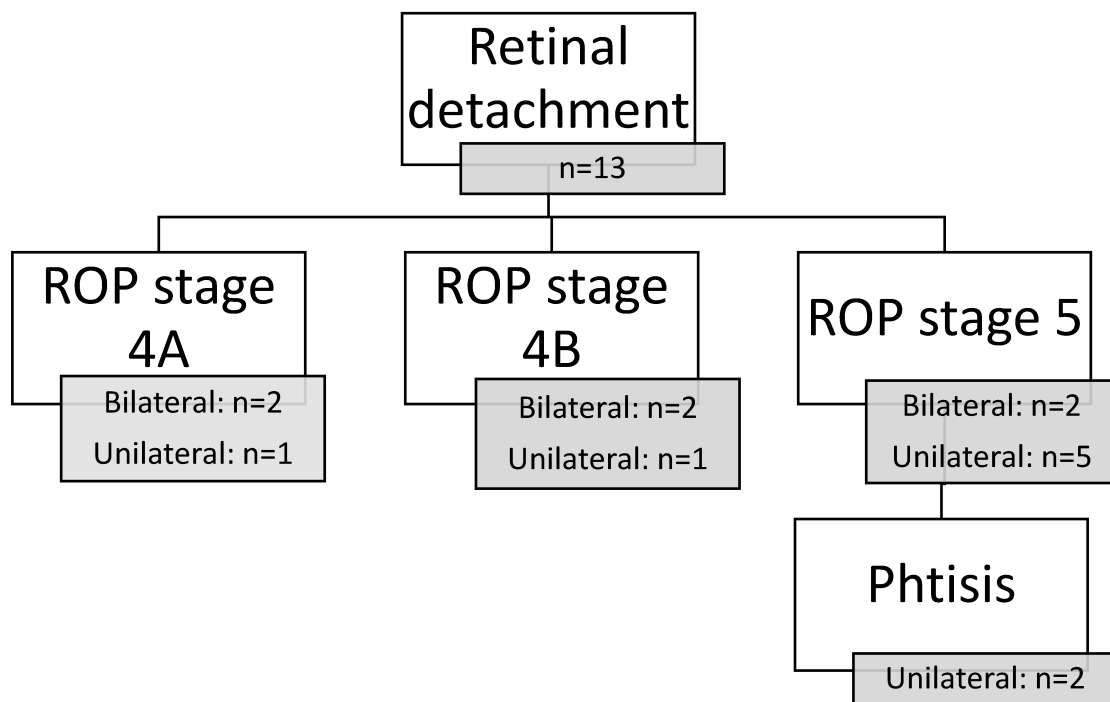

Supplement: inline-supplementary-material-2 [file inline-supplementary-material-2.pdf]
